# Supplementary material for: Screening Circular RNAs Related to Acquired Gefitinib Resistance in Non-small Cell Lung Cancer Cell Lines
Source: PubMed Central journal article supplement (PMC7171488; doi:10.7150/jca.39783), 2020-04-06

Table S1. The list of primers (F, forward and R, reverse) used for qRT-PCR validation

| <b>Gene</b>             | <b>Primer sequence</b>                                                |
|-------------------------|-----------------------------------------------------------------------|
| <b>has_circ_0000567</b> | F: 5'-TTCGGTATCTTCAGTCCACACA-3'<br>R: 5'-TTCCTTTGGTGACACAGTTGC-3'     |
| <b>has_circ_0000722</b> | F: 5'-GCGCCATCCTCCAGCTTT-3'<br>R: 5'-GCGGTGGAAAGCATCCCTA-3'           |
| <b>has_circ_0001147</b> | F: 5'-TGCTGGACCTATGAGGCTTT-3'<br>R: 5'-TGTCCTTGCATCTCTTTCCTCA-3'      |
| <b>has_circ_0005868</b> | F: 5'-GAGGAATACATCAGAGACAAT-3'<br>R: 5'-GTTGAAAGGAATCCTCAAAC-3'       |
| <b>has_circ_0006867</b> | F: 5'-CACGATAGCAGGACGGAGTTA-3'<br>R: 5'-TGCAGCCCTTCTGTATATGCC-3'      |
| <b>has_circ_0000994</b> | F: 5'-TCGAGGAAATGTTATCGTTCCA-3'<br>R: 5'-TCCAACCTGTCACAACCTAACAAAT-3' |
| <b>has_circ_0008143</b> | F: 5'-AGCTCTACAGATGAGTGGCT-3'<br>R: 5'-CCAGCTGCATACAGAAGACTG-3'       |
| <b>has_circ_0001610</b> | F: 5'-CCAGAACCGGGAGAAATGGA-3'<br>R: 5'-TGGCGGTATGTGCCAATGA-3'         |
| <b>GAPDH</b>            | F: 5'-GGATGCAGGAGATCACTG-3'<br>R: 5'-CGATCCACACGGAGTACTT-3'           |

Table S2. The significantly up-regulated and down-regulated circRNAs in the HCC827/GR cells compared with HCC827 cells

| ID               | baseMean<br>(HCC827) | baseMean<br>(HCC827/GR) | Foldchange | P value  | Up-Down | type              | Gene     |
|------------------|----------------------|-------------------------|------------|----------|---------|-------------------|----------|
| hsa_circ_0005695 | 0                    | 9.547365                | Inf        | 0.028634 | Up      | sense-overlapping | SLC30A6  |
| hsa_circ_0055151 | 0                    | 13.348117               | Inf        | 0.004004 | Up      | sense-overlapping | ZNF638   |
| hsa_circ_0001093 | 0                    | 8.275686                | Inf        | 0.04912  | Up      | exonic            | ALS2     |
| hsa_circ_0003337 | 0                    | 8.13082                 | Inf        | 0.04912  | Up      | antisense         | NOP58    |
| hsa_circ_0066776 | 0                    | 10.13082                | Inf        | 0.004004 | Up      | sense-overlapping | PVRL3    |
| hsa_circ_0001410 | 0                    | 13.05839                | Inf        | 0.003058 | Up      | sense-overlapping | DCUN1D4  |
| hsa_circ_0001633 | 0                    | 10.275686               | Inf        | 0.016977 | Up      | sense-overlapping | SOBP     |
| hsa_circ_0007434 | 0                    | 8.348117                | Inf        | 0.04912  | Up      | sense-overlapping | SMURF2   |
| hsa_circ_0081964 | 2.036818             | 14.348117               | 7.044378   | 0.031094 | Up      | sense-overlapping | IMMP2L   |
| hsa_circ_0001147 | 3.16741              | 10.275686               | 3.244192   | 0.015755 | Up      | sense-overlapping | RBM39    |
| hsa_circ_0000567 | 42.752936            | 98.54639                | 2.305017   | 0.02801  | Up      | sense-overlapping | SETD3    |
| hsa_circ_0000231 | 114.765467           | 52.348117               | 0.456131   | 0.04352  | Down    | sense-overlapping | ARHGAP12 |
| hsa_circ_0001900 | 83.86329             | 34.841165               | 0.415451   | 0.031148 | Down    | sense-overlapping | CAMSAP1  |
| hsa_circ_0032649 | 34.075361            | 9.275686                | 0.27221    | 0.015124 | Down    | exonic            | MLH3     |
| hsa_circ_0001725 | 15.156175            | 3.98596                 | 0.262992   | 0.047786 | Down    | sense-overlapping | LMTK2    |
| hsa_circ_0023919 | 15.156175            | 3.05839                 | 0.201791   | 0.047786 | Down    | sense-overlapping | PICALM   |
| hsa_circ_0006867 | 13.234262            | 2.6238                  | 0.198258   | 0.043469 | Down    | sense-overlapping | LRBA     |
| hsa_circ_0002439 | 14.156175            | 2.275686                | 0.160755   | 0.031094 | Down    | sense-overlapping | TFAP4    |
| hsa_circ_0001610 | 45.156175            | 6.275686                | 0.138977   | 0.000306 | Down    | sense-overlapping | TNFRSF21 |
| hsa_circ_0000722 | 16.624699            | 2.069112                | 0.12446    | 0.001101 | Down    | exonic            | GSE1     |
| hsa_circ_0000179 | 11.512459            | 0                       | 0          | 0.010264 | down    | sense-overlapping | DTL      |
| hsa_circ_0057123 | 8.65722              | 0                       | 0          | 0.04912  | Down    | sense-overlapping | CDCA7    |
| hsa_circ_0004191 | 8.31235              | 0                       | 0          | 0.04912  | Down    | sense-overlapping | PGAP1    |
| hsa_circ_0001277 | 8.31235              | 0                       | 0          | 0.04912  | Down    | sense-overlapping | SLC4A7   |
| hsa_circ_0005605 | 8.390437             | 0                       | 0          | 0.04912  | Down    | sense-overlapping | TBC1D23  |
| hsa_circ_0067492 | 12.390437            | 0                       | 0          | 0.006339 | Down    | sense-overlapping | IL20RB   |
| hsa_circ_0002785 | 12.85896             | 0                       | 0          | 0.006339 | Down    | sense-overlapping | ADGRA3   |
| hsa_circ_0006916 | 9.40557              | 0                       | 0          | 0.028634 | Down    | sense-overlapping | HOMER1   |
| hsa_circ_0004973 | 8.78087              | 0                       | 0          | 0.04912  | Down    | sense-overlapping | MTO1     |
| hsa_circ_0001638 | 8.546612             | 0                       | 0          | 0.04912  | Down    | sense-overlapping | KIAA1919 |
| hsa_circ_0007618 | 15.18645             | 0                       | 0          | 0.001674 | Down    | sense-overlapping | DOCK5    |
| hsa_circ_0085173 | 8.624699             | 0                       | 0          | 0.04912  | Down    | sense-overlapping | DENND4C  |
| hsa_circ_0008342 | 9.17131              | 0                       | 0          | 0.028634 | Down    | sense-overlapping | CLNS1A   |
| hsa_circ_0023812 | 10.546612            | 0                       | 0          | 0.016977 | Down    | sense-overlapping | NARS2    |
| hsa_circ_0006128 | 8.546612             | 0                       | 0          | 0.04912  | Down    | sense-overlapping | AEBP2    |
| hsa_circ_0004047 | 8.546612             | 0                       | 0          | 0.04912  | Down    | sense-overlapping | BAZ1A    |
| hsa_circ_0000557 | 8.624699             | 0                       | 0          | 0.04912  | Down    | sense-overlapping | NEK9     |
| hsa_circ_0000642 | 8.78087              | 0                       | 0          | 0.04912  | Down    | sense-overlapping | ZFAND6   |
| hsa_circ_0006127 | 9.546612             | 0                       | 0          | 0.028634 | Down    | sense-overlapping | SRCAP    |

|                  |           |   |   |          |      |                   |        |
|------------------|-----------|---|---|----------|------|-------------------|--------|
| hsa_circ_0007766 | 13.702787 | 0 | 0 | 0.004004 | Down | sense-overlapping | ERBB2  |
| hsa_circ_0004956 | 8.702787  | 0 | 0 | 0.04912  | Down | sense-overlapping | UBA2   |
| hsa_circ_0059475 | 8         | 0 | 0 | 0.04912  | Down | sense-overlapping | TASP1  |
| hsa_circ_0002805 | 8         | 0 | 0 | 0.04912  | Down | sense-overlapping | ZBTB46 |
| hsa_circ_0001189 | 9         | 0 | 0 | 0.028634 | Down | sense-overlapping | MORC3  |
| hsa_circ_0003102 | 10        | 0 | 0 | 0.016977 | Down | sense-overlapping | LRP5L  |
| hsa_circ_0001246 | 9         | 0 | 0 | 0.028634 | Down | sense-overlapping | ATXN10 |

Table S3. The significantly up-regulated and down-regulated circRNAs in the PC9/GR cells compared with the PC9 cells

| ID               | BaseMean<br>(PC9) | BaseMean<br>(PC9/GR) | Fold change | p-value  | Regulation | Type              | Gene    |
|------------------|-------------------|----------------------|-------------|----------|------------|-------------------|---------|
| hsa_circ_0013743 | 0                 | 11.386081            | Inf         | 0.016477 | Up         | sense-overlapping | MAN1A2  |
| hsa_circ_0000145 | 0                 | 9.315885             | Inf         | 0.040286 | Up         | sense-overlapping | PFDN2   |
| hsa_circ_0058495 | 0                 | 20.70197             | Inf         | 0.000684 | Up         | sense-overlapping | RHBDD1  |
| hsa_circ_0087220 | 0                 | 13.45628             | Inf         | 0.007352 | Up         | sense-overlapping | C9orf41 |
| hsa_circ_0000471 | 0                 | 22.77216             | Inf         | 0.000387 | Up         | sense-overlapping | N4BP2L2 |
| hsa_circ_0030388 | 0                 | 12.42118             | Inf         | 0.010919 | Up         | intergenic        |         |
| hsa_circ_0000530 | 0                 | 9.315885             | Inf         | 0.040286 | Up         | sense-overlapping | CTAGE5  |
| hsa_circ_0006886 | 0                 | 18.63177             | Inf         | 0.001246 | Up         | sense-overlapping | FAM192A |
| hsa_circ_0007580 | 0                 | 9.315885             | Inf         | 0.040286 | Up         | sense-overlapping | PRKCA   |
| hsa_circ_0000799 | 0                 | 9.315885             | Inf         | 0.040286 | Up         | sense-overlapping | BPTF    |
| hsa_circ_0061651 | 0                 | 9.315885             | Inf         | 0.040286 | Up         | exonic            | HLCS    |
| hsa_circ_0007817 | 0                 | 10.35098             | Inf         | 0.025361 | Up         | sense-overlapping | HUWE1   |
| hsa_circ_0002153 | 0                 | 9.315885             | Inf         | 0.040286 | Up         | sense-overlapping | MID2    |
| hsa_circ_0008901 | 3.864367          | 87.983358            | 22.76786    | 1.67-05  | Up         | sense-overlapping | PTPN12  |
| hsa_circ_0000994 | 3.864367          | 42.43903             | 10.98214    | 0.001123 | Up         | exonic            | SLC8A1  |
| hsa_circ_0007528 | 1.932184          | 15.52648             | 8.035714    | 0.034554 | Up         | sense-overlapping | PIGN    |
| hsa_circ_0003511 | 2.898275          | 21.73707             | 7.5         | 0.016725 | Up         | sense-overlapping | LMBR1   |
| hsa_circ_0000914 | 1.932184          | 14.49138             | 7.5         | 0.045578 | Up         | sense-overlapping | FKBP8   |
| hsa_circ_0006837 | 2.898275          | 17.59667             | 6.071429    | 0.041192 | Up         | sense-overlapping | RERE    |
| hsa_circ_0002458 | 8.694826          | 46.57943             | 5.357143    | 0.010377 | Up         | sense-overlapping | PTPN12  |
| hsa_circ_0005868 | 2.898275          | 15.52647             | 5.357143    | 0.036569 | Up         | sense-overlapping | ITCH    |
| hsa_circ_0008143 | 1.932184          | 10.35098             | 5.357139    | 0.025361 | Up         | sense-overlapping | RBM39   |
| hsa_circ_0002191 | 6.762642          | 27.94766             | 4.132653    | 0.045229 | Up         | sense-overlapping | C9orf3  |
| hsa_circ_0000567 | 12.55919          | 44.50923             | 3.543956    | 0.044997 | Up         | sense-overlapping | SETD3   |
| hsa_circ_0083709 | 23.1862           | 80.73767             | 3.482143    | 0.034864 | Up         | sense-overlapping | DOCK5   |
| hsa_circ_0088030 | 22.22011          | 74.52708             | 3.354037267 | 0.041622 | Up         | sense-overlapping | PTGR1   |
| hsa_circ_0006867 | 9.660918          | 4.140393             | 0.428571    | 0.038795 | Down       | sense-overlapping | LRBA    |
| hsa_circ_0031584 | 154.5747          | 46.57943             | 0.301339    | 0.036748 | Down       | sense-overlapping | ARHGAP5 |
| hsa_circ_0009061 | 51.20286          | 14.49138             | 0.283019    | 0.04295  | Down       | sense-overlapping | KDM1A   |
| hsa_circ_0006410 | 35.7454           | 8.280787             | 0.23166     | 0.030249 | Down       | sense-overlapping | TUSC3   |
| hsa_circ_0016601 | 36.71149          | 8.280787             | 0.225564    | 0.026985 | Down       | sense-overlapping | DNAH14  |
| hsa_circ_0008282 | 33.81321          | 7.245688             | 0.214286    | 0.02571  | Down       | sense-overlapping | MARK3   |
| hsa_circ_0003848 | 21.25402          | 4.140393             | 0.194805    | 0.042271 | Down       | sense-overlapping | PSEN1   |
| hsa_circ_0032649 | 38.64367          | 7.245688             | 0.1875      | 0.014126 | Down       | exonic            | MLH3    |
| hsa_circ_0000419 | 42.50804          | 7.245688             | 0.170455    | 0.009035 | Down       | sense-overlapping | RAB3IP  |
| hsa_circ_0001402 | 33.81321          | 5.175492             | 0.153061    | 0.009594 | Down       | sense-overlapping | TBC1D1  |
| hsa_circ_0008274 | 55.06723          | 8.280787             | 0.150376    | 0.004173 | Down       | sense-overlapping | UGGT2   |
| hsa_circ_0002402 | 9.660918          | 0                    | 0.00001     | 0.038795 | Down       | sense-overlapping | ECE1    |
| hsa_circ_0012144 | 11.5931           | 0                    | 0           | 0.017556 | Down       | sense-overlapping | ERI3    |

|                  |          |   |   |          |      |                   |          |
|------------------|----------|---|---|----------|------|-------------------|----------|
| hsa_circ_0053535 | 12.55919 | 0 | 0 | 0.012138 | Down | exonic            | BIRC6    |
| hsa_circ_0003910 | 9.660918 | 0 | 0 | 0.038795 | Down | intergenic        |          |
| hsa_circ_0065299 | 14.49138 | 0 | 0 | 0.006034 | Down | sense-overlapping | SMARCC1  |
| hsa_circ_0005023 | 10.62701 | 0 | 0 | 0.025765 | Down | sense-overlapping | STAG1    |
| hsa_circ_0006248 | 9.660918 | 0 | 0 | 0.038795 | Down | sense-overlapping | TRA2B    |
| hsa_circ_0072081 | 10.62701 | 0 | 0 | 0.025765 | Down | sense-overlapping | MTMR12   |
| hsa_circ_0072386 | 9.660918 | 0 | 0 | 0.038795 | Down | sense-overlapping | HMGCS1   |
| hsa_circ_0001833 | 9.660918 | 0 | 0 | 0.038795 | Down | sense-overlapping | MROH1    |
| hsa_circ_0003537 | 9.660918 | 0 | 0 | 0.038795 | Down | sense-overlapping | FOCAD    |
| hsa_circ_0006276 | 39.60976 | 0 | 0 | 1.58E-05 | Down | sense-overlapping | ANXA7    |
| hsa_circ_0008148 | 10.62701 | 0 | 0 | 0.025765 | Down | sense-overlapping | BTAF1    |
| hsa_circ_0019170 | 11.5931  | 0 | 0 | 0.017556 | Down | sense-overlapping | EXOC6    |
| hsa_circ_0008189 | 9.660918 | 0 | 0 | 0.038795 | Down | sense-overlapping | C11orf30 |
| hsa_circ_0000555 | 9.660918 | 0 | 0 | 0.038795 | Down | sense-overlapping | YLPM1    |
| hsa_circ_0007979 | 9.660918 | 0 | 0 | 0.038795 | Down | sense-overlapping | DYNC1H1  |
| hsa_circ_0001172 | 10.62701 | 0 | 0 | 0.025765 | Down | intergenic        |          |
| hsa_circ_0005386 | 10.62701 | 0 | 0 | 0.025765 | Down | sense-overlapping | NF2      |

Figure S1: The correlation of potential target mRNAs of hsa\_circ\_0000567 with overall survival of lung cancer patients.

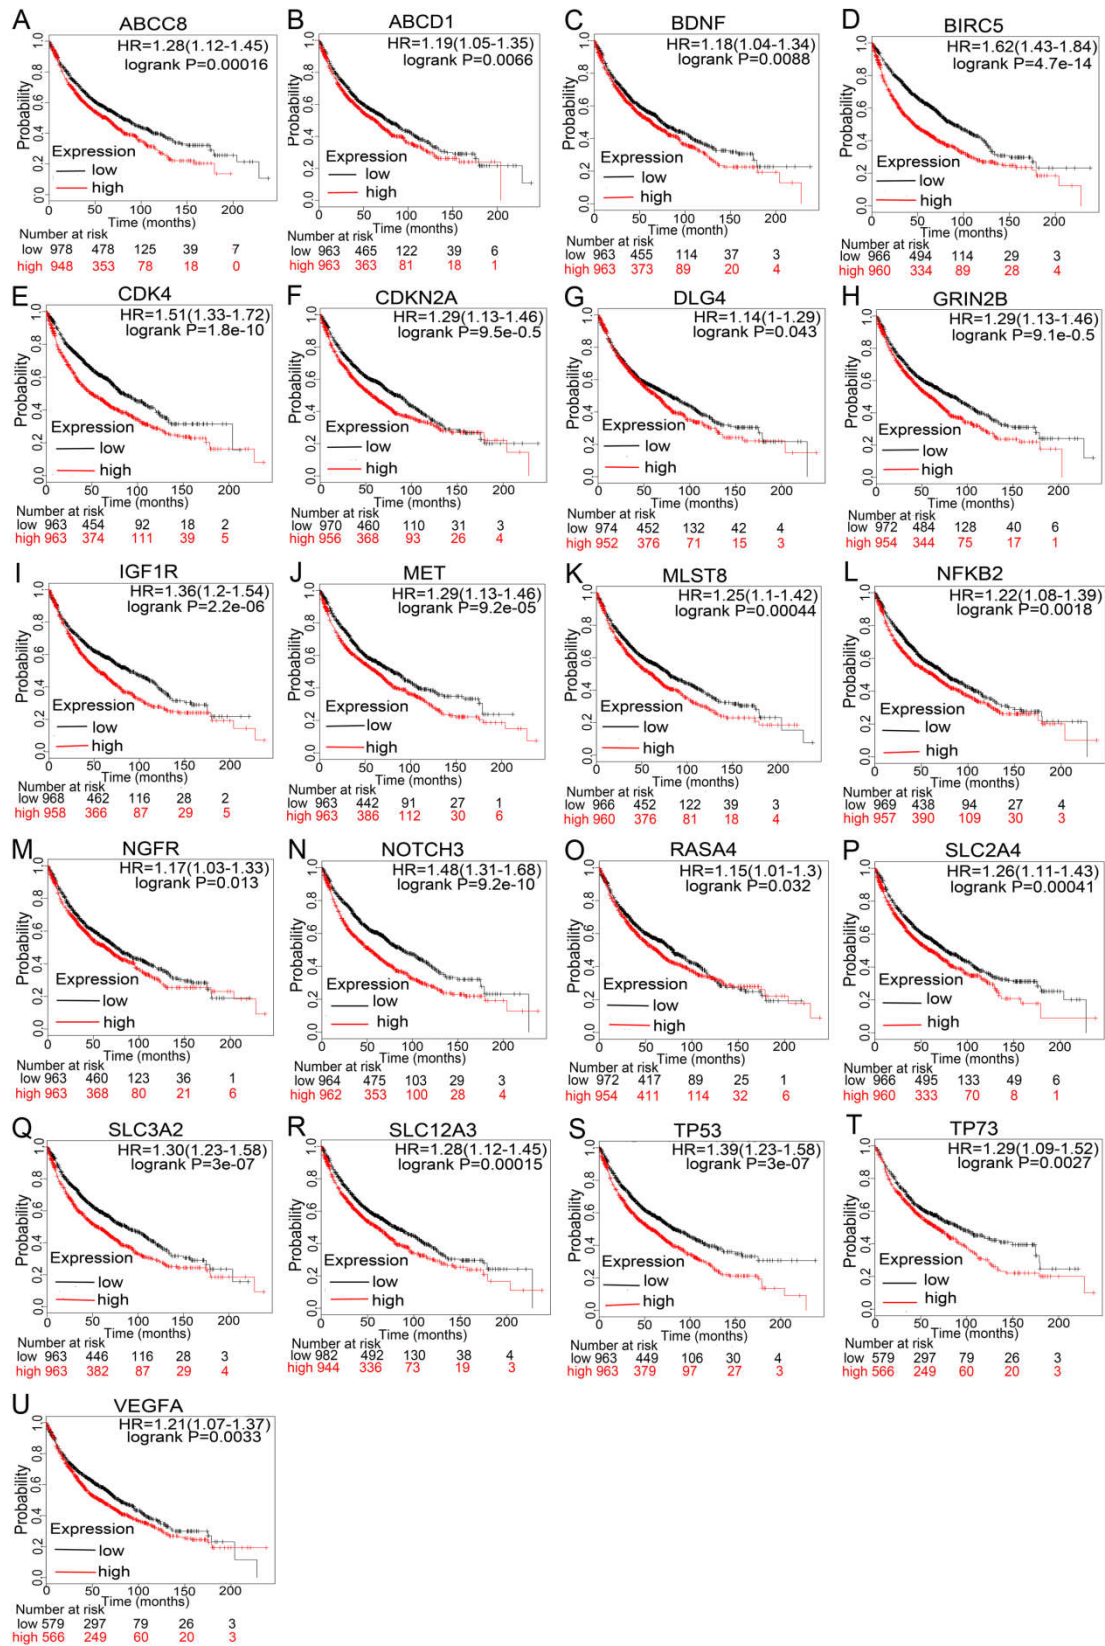

Figure S2: The correlation of potential target mRNAs of hsa\_circ\_0006867 with overall survival of lung cancer patients.

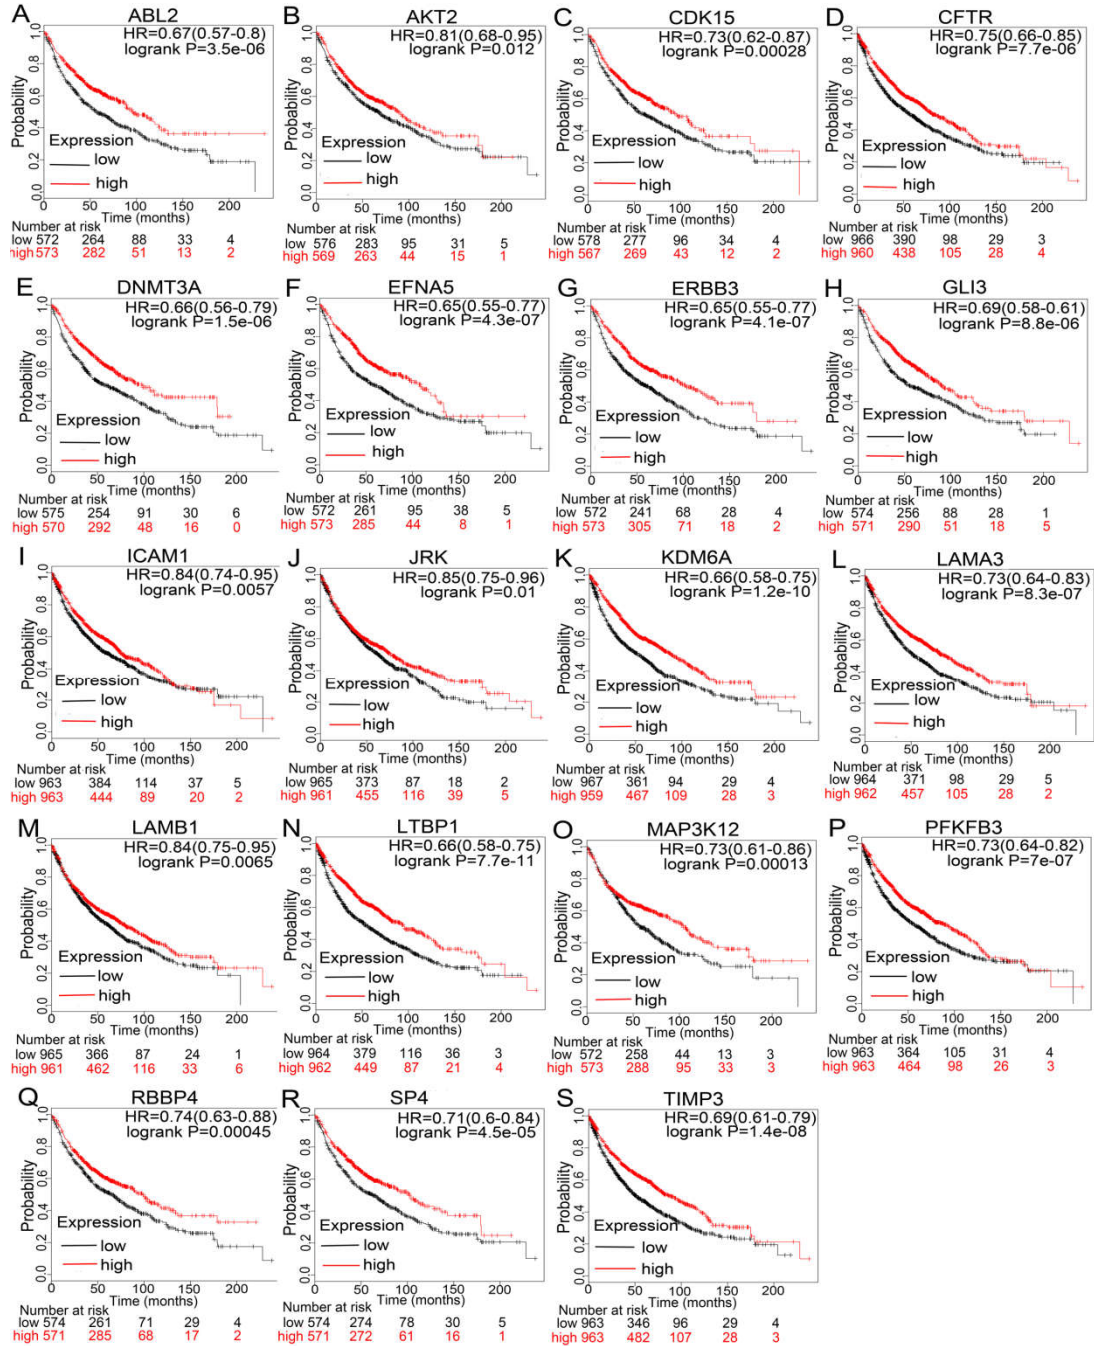

Supplement: jcav11p3816s1.pdf [file jcav11p3816s1.pdf]
